# Supplementary material for: Enhanced charge carrier extraction and transport with interface modification for efficient tin-based perovskite solar cells
Source: Royal Society of Chemistry journal article supplement (doi:10.1039/d4ta06046f), 2024-11-19
Supplement: d4ta06046f1.pdf [file d4ta06046f1.pdf]

## Supporting Materials for

### **Enhanced charge carrier extraction and transport with interface modification for efficient tin-based perovskite solar cells**

Zhenzhu Zhao<sup>1</sup>, Mulin Sun<sup>1</sup>, Fang Xiang<sup>1</sup>, Xuefei Wu<sup>6</sup>, Zachary Fink<sup>5</sup>, Zongming Huang<sup>2</sup>, Junyao Gao<sup>2</sup>, Honghe Ding<sup>3</sup>, Pengju Tan<sup>1</sup>, Chengjian Yuan<sup>1</sup>, Yuqian Yang<sup>1</sup>, Nikita A. Emelianov<sup>8</sup>, Lyubov A. Frolova<sup>8</sup>, Zhengguo Xiao<sup>2</sup>, Pavel A. Troshin<sup>7,8</sup>, Thomas P. Russell<sup>5,6</sup>, Junfa Zhu<sup>3</sup>, Yu Li<sup>3,4,\*</sup>, Qin Hu<sup>1,\*</sup>

<sup>1</sup>School of Microelectronics, University of Science and Technology of China, Hefei 230026, China.

<sup>2</sup>Department of Physics, CAS Key Laboratory of Strongly Coupled Quantum Matter Physics, University of Science and Technology of China, Hefei 230026, Anhui, China.

<sup>3</sup>National Synchrotron Radiation Laboratory, University of Science and Technology of China, Hefei, Anhui 230029, China.

<sup>4</sup>3rd Institute of Physics, University of Stuttgart, 70569, Stuttgart, Germany.

<sup>5</sup>Polymer Science and Engineering Department, Conte Center for Polymer Research, University of Massachusetts, 120 Governors Drive, Amherst, MA, 01003 USA.

<sup>6</sup>Materials Science Division, Lawrence Berkeley National Laboratory, Berkeley, CA 94720, USA

<sup>7</sup>Zhengzhou Research Institute of HIT, 26 Longyuan East 7th, Jinshui District, Zhengzhou, Henan Province, 450000, China.

<sup>8</sup>Federal Research Center for Problems of Chemical Physics and Medicinal Chemistry of the Russian Academy of Sciences, Semenov ave. 1, Chernogolovka, Moscow region, 142432, Russia.

\*Corresponding authors: Q.H. (qinhu20@ustc.edu.cn) and Y. L. (yli1@ustc.edu.cn).

## **This PDF file includes:**

Materials and Methods

Figs. S1 to S8

Tables S1 to S4

## **Materials and Methods**

### Materials

All chemicals were used as received without further purification. Tin (II) iodide ( $\text{SnI}_2$ , 99.99%), tin (II) fluoride ( $\text{SnF}_2$ , 99%), dimethylformamide (DMF, 99.8%), dimethyl sulfoxide (DMSO,  $\geq 99.9\%$ ), chlorobenzene (CB, 99.8%), ethanol (EtOH,  $\geq 99.5\%$ ) and isopropanol (IPA, 99.5%) were purchased from Sigma Aldrich. Formamidinium iodide (FAI) and phenethylammonium bromide (PEABr) were purchased from Great Cell Solar (Australia). Poly(3,4-ethylenedioxythiophene) polystyrenesulfonate (PEDOT:PSS, Clevious PVP AI 4083), Poly[bis(4-phenyl) (2,4,6-trimethylphenyl) amine] (PTAA, average  $M_n$  7,000-10,000 (GPC)), bathocuproine (BCP) and indium tin oxides (ITO) were purchased from Advanced Election Technology Co., Ltd. (Yingkou, China). 1,1,4,4-Tetrahydro-di [1,4]methanonaphthaleno [1,2:2,3,5,6,6:2,3] [5,6] fullerene-C<sub>60</sub> (indene-C<sub>60</sub> bisadduct, ICBA) were purchased from 1-Materials. Trifluoroethanol (TFE, 99%) were purchased from J&K Scientific. Silver (Ag) and gold (Au) were obtained from commercial sources.

### Device Fabrication

The glass substrates coated with indium tin oxide (ITO) were cleaned with detergent, deionized water, acetone, isopropanol and ethanol by ultrasonication for 15 min each. After drying with nitrogen flow, the ITO substrates were treated with ultraviolet-ozone for 20 min. PEDOT:PSS, a hole transport layer, was then spin-coated onto the ITO at 5000 rpm for 40 s and annealed at 150 °C for 10 min. After that, the substrates were transferred into a glove box filled with nitrogen. 60  $\mu\text{L}$  IPA/ TFE/ EtOH solvent was spin-coated onto PEDOT:PSS film at 8000 rpm for 60 s. 0.8 M control

perovskite precursor solution was prepared by dissolving SnF<sub>2</sub>, PEABr, FAI and SnI<sub>2</sub> at a molar ratio of 0.10:0.15:0.85:1.00 in mixed solvent of DMF (800 μL) and DMSO (200 μL). 40 μL precursor was spin-coated onto the substrate at 5000 rpm for 40 s with 100 μL chlorobenzene dripped onto the perovskite film at 25 s. Then the as-prepared films were annealed at 80 °C for 10 min. The ICBA layer was spin-coating (21 mg mL<sup>-1</sup> in chlorobenzene) at 1200 rpm for 30 s and then annealing at 70 °C for 10 min. Saturated BCP in isopropanol was spin-coated at 6000 rpm for 30 s, and the as-prepared film thermally annealed at 70 °C for 10 min. All precursors were filtered with 0.22 μm polytetra-fluoroethylene (PTFE) filters before spin-coating. Afterwards, Ag (100 nm) were sequentially deposited via thermal evaporation under  $2 \times 10^{-4}$  Pa, resulting in an active area of 0.1 cm<sup>2</sup>. Devices were encapsulated with cover glass and ultraviolet-curable epoxy. The hole only devices for space charge limited current (SCLC) measurement were fabricated with the structure of ITO/ PEDOT:PSS/ Perovskite/ PTAA/ Au.

#### Device characterization

The current-voltage curves were measured in a glove box at AM 1.5G using a Keithley 2400 source-measure unit. The cells were illuminated by a 150 W xenon lamp class AAA solar simulator (XES-40S3-TT). The simulator's power was calibrated to 100 mW cm<sup>-2</sup> by a silicon reference cell associated with a KG5 filter certified by NPVM (Chinese national PV industry measurement and testing center). The devices were measured in a forward scan from -0.05 V to 1.0 V with identical interval, under a mask of 0.1 cm<sup>2</sup>. The EQE spectra were recorded by an Enli Technology (Taiwan) EQE measurement system (QE-R), and the light intensity was calibrated with a standard single-crystal Si-cell. Long-term device stability tests for PSCs were performed by measuring the J-V curves periodically for a certain period of storage in the N<sub>2</sub> atmosphere.

#### Film Characterization

The top-view scanning electron microscopy (SEM) images were taken by Cold FE-SEM, SU8220, Hitachi. The cross-sectional SEM images of inverted PSCs were taken with Hitachi SU8220. Kelvin probe force microscopy (KPFM) images were performed using Bruker Dimension Icon. Photoluminescence (PL) was measured using a Horiba Fluorolog-3 system with a petite integrating sphere. Timeresolved PL (TRPL) measurments was taken using a Horiba time-correlated single-photon counting system. Ultraviolet Photoelectron Spectroscopy (UPS) was performed by PHI 5000 VersaProbe III with He I source (21.22 eV) under an applied negative bias of 9.0 V. The grazing-incidence wide-angle X-ray scattering (GIWAXS) studies were performed at the beamline 7.3.3 of Advanced Light Source (LBNL), America, using beam energy of 10 keV ( $\lambda = 1.24 \text{ \AA}$ ).

## FIGURES

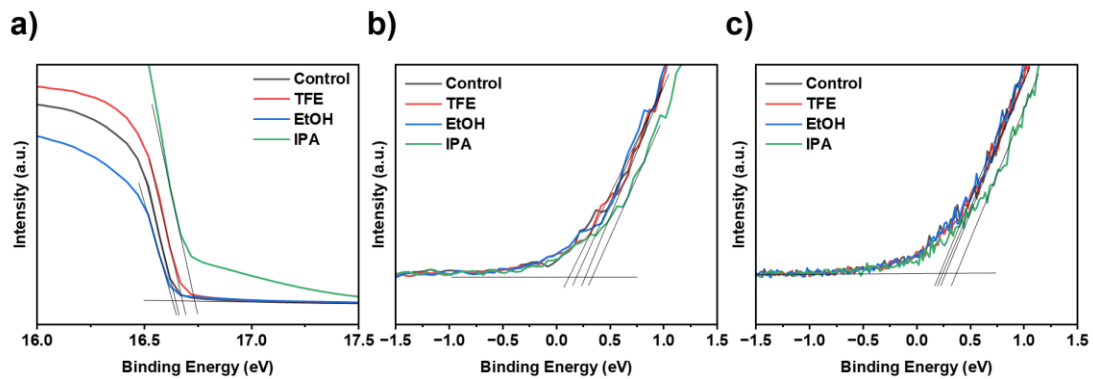

Fig. S1. UPS spectra of a) cutoff edge with bias, b) valence band with bias and c) valence band without bias.

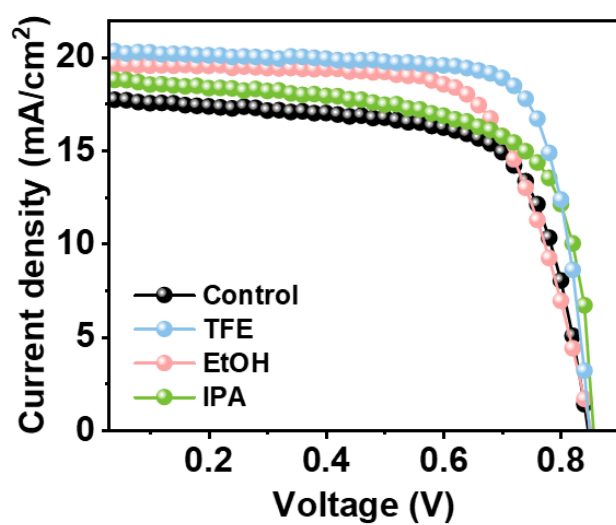

Fig. S2.  $J$ - $V$  curves of of control and post-treated devices.

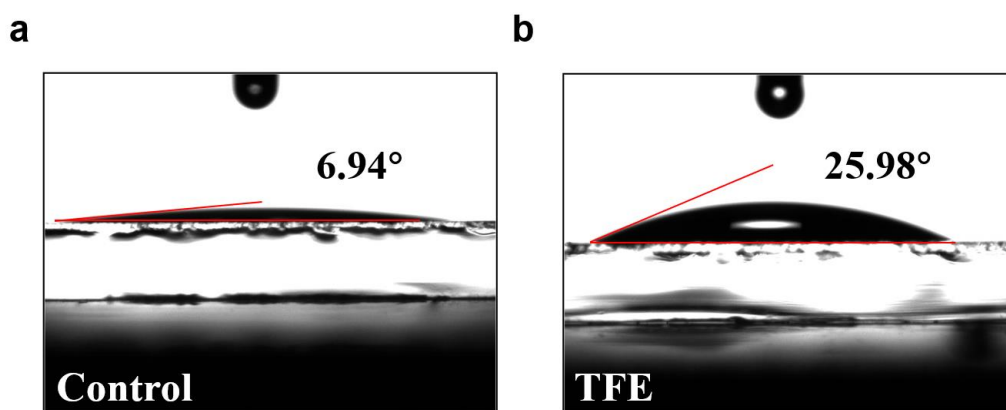

Fig. S3. Contact angles of (a) control and (b) TFE-treated PEDOT:PSS films.

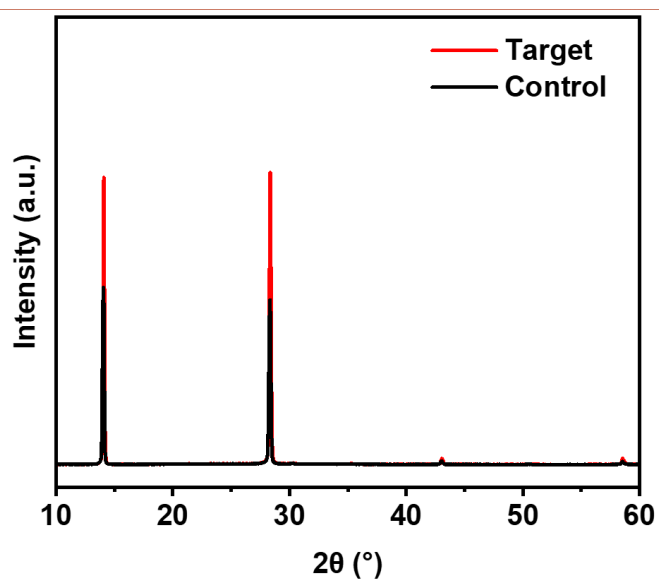

Fig. S4 XRD results of control and TFE-treated PEDOT:PSS films.

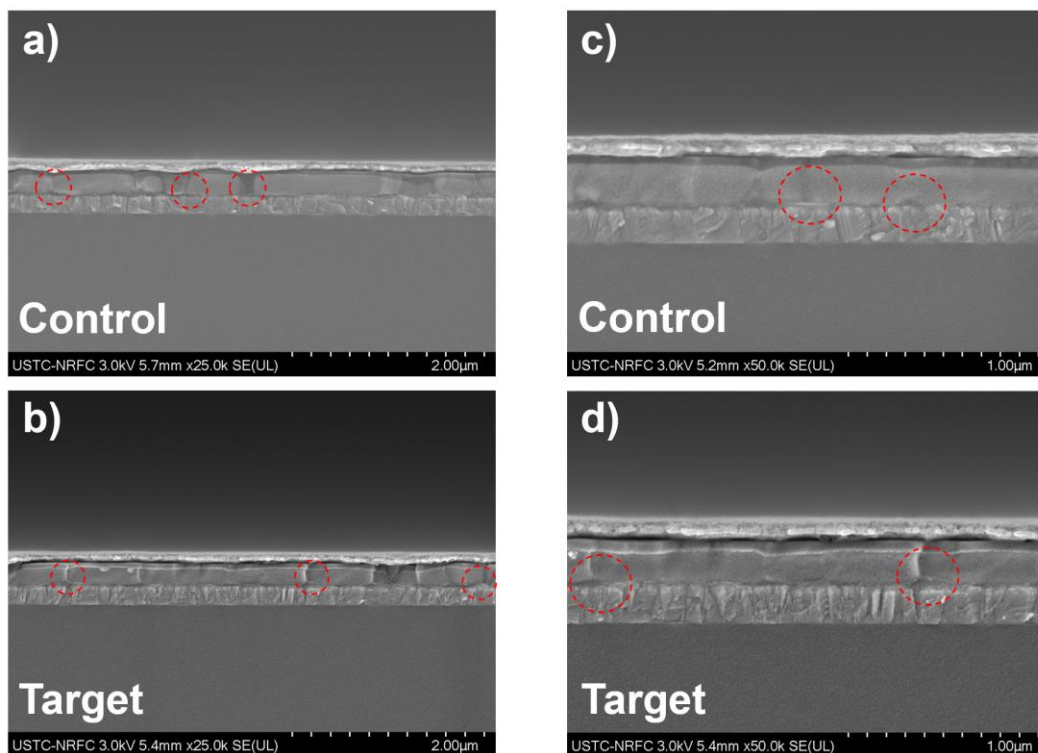

Fig. S5 SEM cross-sectional images of control and TFE-treated PEDOT:PSS films.

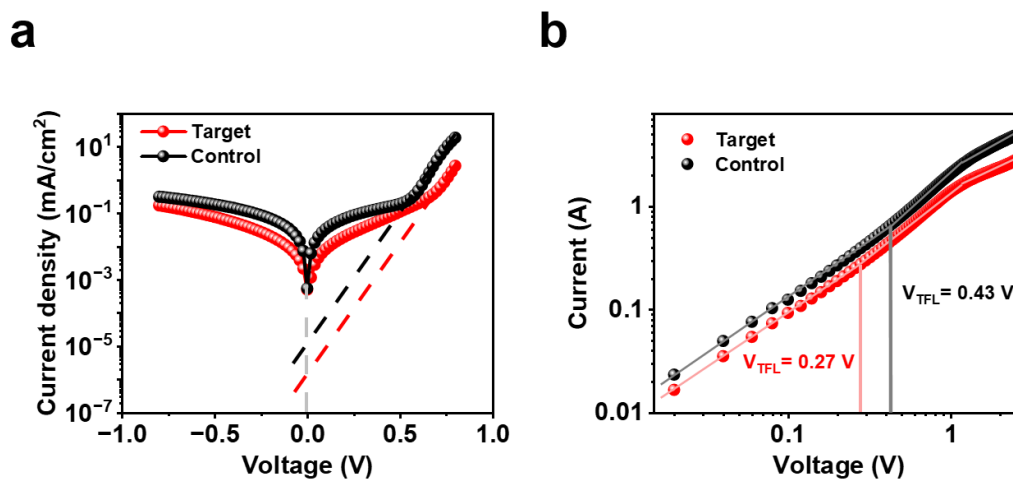

Fig. S6. (a) Dark J-V curves of the control and target devices. (b) SCLC results for the hole-only devices used to retrieve the trap-state density.

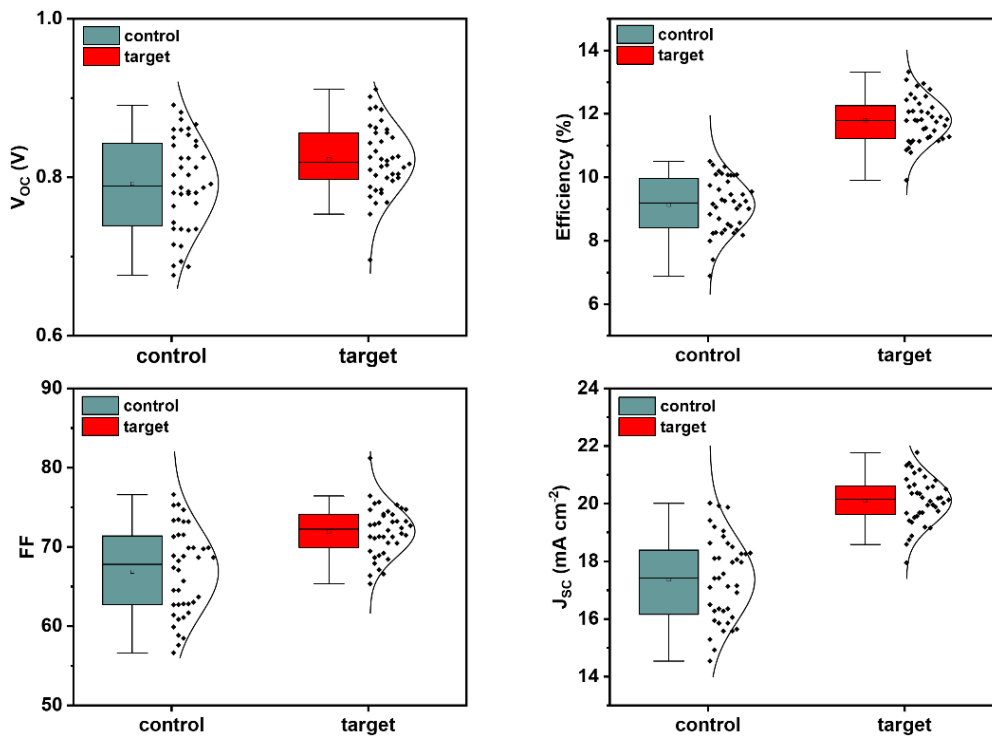

Fig. S7 Efficiency statistics of 80 Sn- based perovskite solar cells.

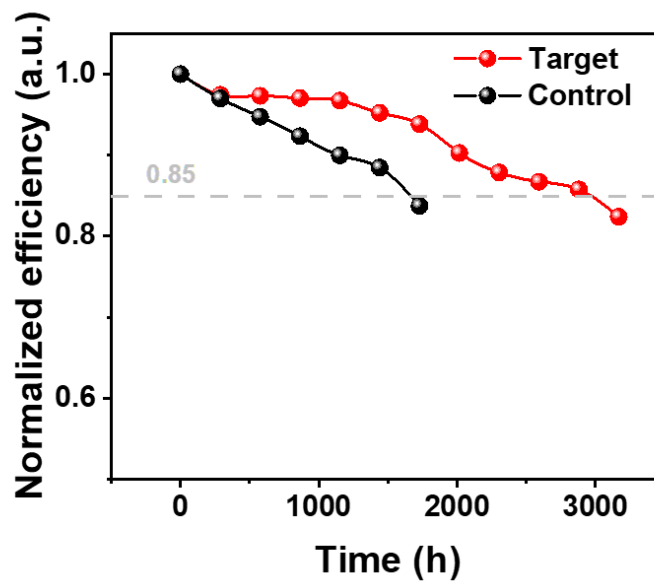

Fig. S8. (a) Store stability in nitrogen atmosphere.

## Tables

Table S1: Crystallite sizes, stacking distances, and the PEDOT ratios in PEDOT:PSS films treated by different solvents.

| solvent treatment | d-spacing of PSS (Å) | d-spacing of PEDOT (Å) | PSS crystal size (Å) | PEDOT crystal size (Å) | PEDOT/Total ratio |
|-------------------|----------------------|------------------------|----------------------|------------------------|-------------------|
| Control           | 4.66                 | 3.41                   | 15.09                | 13.59                  | 0.38              |
| TFE               | 4.66                 | 3.41                   | 14.76                | 13.80                  | 0.40              |
| EtOH              | 4.64                 | 3.39                   | 15.07                | 13.69                  | 0.42              |
| IPA               | 4.64                 | 3.38                   | 15.23                | 13.66                  | 0.39              |

Table S2: Cut-off edge with bias, valence edge with and without bias of UPS test, valence band maximum and Fermi level of PEDOT:PSS with IPA/ EtOH/ TFE solvent treatment and without solvent treatment.

| solvent treatment | cut-off edge with bias (eV) | valence edge with bias (eV) | valence edge without bias (eV) | valence band maximum (eV) | Fermi Level (eV) |
|-------------------|-----------------------------|-----------------------------|--------------------------------|---------------------------|------------------|
| Control           | 16.6486                     | 0.1924                      | 0.2728                         | -4.7638                   | -4.4910          |
| EtOH              | 16.632                      | 0.2216                      | 0.225                          | -4.8096                   | -4.5846          |
| IPA               | 16.7411                     | 0.3675                      | 0.3721                         | -4.8464                   | -4.4743          |
| TFE               | 16.6812                     | 0.2855                      | 0.2729                         | -4.8243                   | -4.5514          |

Table S3: Time-resolved photoluminescence fitting value of perovskite films based on PEDOT:PSS with IPA/ EtOH/ TFE solvent treatment and without solvent treatment.

| solvent treatment | A1   | T1 (ns) | A2   | T2 (ns) | $\tau$ (ns) |
|-------------------|------|---------|------|---------|-------------|
| control           | 0.11 | 0.58    | 0.89 | 7.14    | 7.07        |
| TFE               | 0.48 | 1.41    | 0.55 | 3.12    | 2.62        |
| IPA               | 0.16 | 1.47    | 0.85 | 3.70    | 3.54        |
| EtOH              | 0.22 | 1.97    | 0.78 | 4.15    | 3.89        |

Table S4: Specific parameters of  $J-V$  curves in Fig. S2.

| solvent treatment | Control | EtOH    | IPA     | TFE     |
|-------------------|---------|---------|---------|---------|
| V <sub>oc</sub>   | 0.8459  | 0.8507  | 0.8554  | 0.8495  |
| J <sub>sc</sub>   | 18.1052 | 19.6620 | 19.0670 | 20.5001 |
| FF                | 0.6827  | 0.6892  | 0.6811  | 0.7638  |
| Efficiency        | 10.4557 | 11.5279 | 11.1087 | 13.3015 |
